# Supplementary material for: Piezotronic-effect-enhanced Ag2S/ZnO photocatalyst for organic dye degradation
Source: Royal Society of Chemistry journal article supplement (doi:10.1039/c7ra10206b), 2017-01-01
Supplement: c7ra10206b1.pdf [file c7ra10206b1.pdf]

## Electronic Supplementary Information

### Piezotronic Effect Enhanced Photocatalyst of Ag<sub>2</sub>S/ZnO for Degradation of Organic Dyes

*Yang Zhang,<sup>a,†</sup> Caihong Liu,<sup>a,†</sup> Gaolong Zhu,<sup>b</sup> Xin Huang,<sup>a</sup> Wei Liu,<sup>a</sup> Weiguo Hu,<sup>a</sup>*

*Ming Song,<sup>a</sup> Weidong He,<sup>b</sup> Juan Liu<sup>\*c</sup> and Junyi Zhai<sup>\*a</sup>*

<sup>a</sup>Beijing Institute of Nanoenergy and Nanosystems, Chinese Academy of Sciences; National Center for Nanoscience and Technology (NCNST), Beijing, 100083, China

<sup>b</sup>School of Energy Science and Engineering, University of Electronic Science and Technology, Chengdu, Sichuan, 611731, China

<sup>c</sup>College of Environmental Sciences and Engineering, Peking University, Beijing, 100871, China

†These authors contributed equally.

Address correspondence to Junyi Zhai, [jyzhai@binn.cas.cn](mailto:jyzhai@binn.cas.cn); Juan Liu, [juan.liu@pku.edu.cn](mailto:juan.liu@pku.edu.cn).

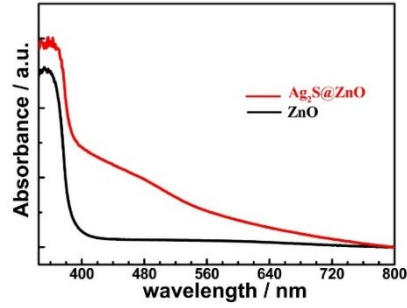

Fig. S1 Absorption spectra of ZnO and Ag<sub>2</sub>S@ZnO NW film.

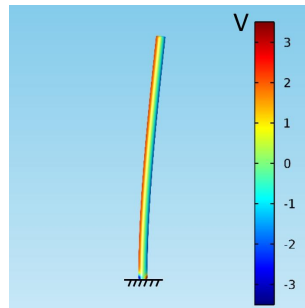

Fig. S2 The piezopotential distribution of mechanically bended ZnO NW.

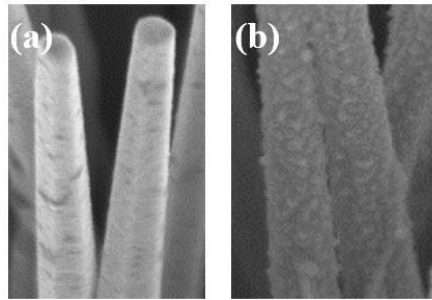

Fig. S3 SEM images of (a) ZnO NW and (b) Ag<sub>2</sub>S@ZnO NWs after photocatalytic activity.

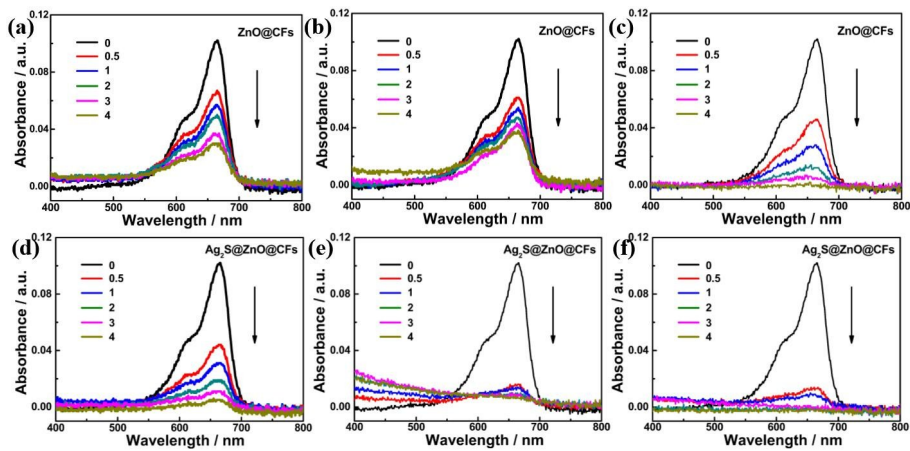

Fig. S4 UV-vis spectra of MB solution which catalyzed by (a-c) ZnO and (d-f) Ag<sub>2</sub>S@ZnO NWs under illumination, sonication, and illumination/sonication conditions.

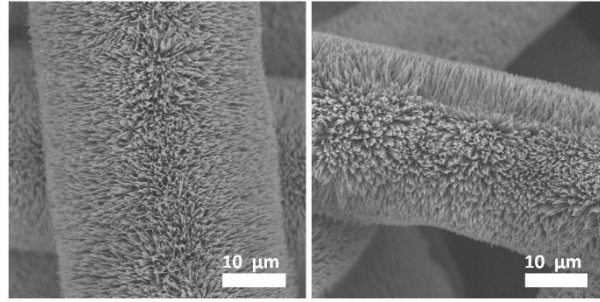

**Fig. S5** SEM images of (a) ZnO NW and (b) Ag<sub>2</sub>S@ZnO NWs on carbon fibers after dye degradations.

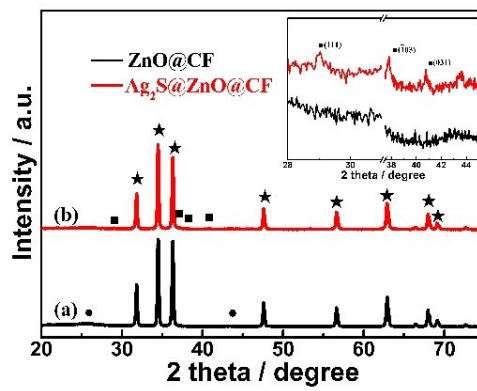

**Fig. S6** XRD spectra of (a) ZnO and (b) Ag<sub>2</sub>S@ZnO NWs after eight cycle of photocatalytic activity with applying sonication.

| sample                                                   | Morphology    | Synthetic method         | Illumination condition | Dye       | Degradation rate (C/C <sub>0</sub> ) | Ref           |
|----------------------------------------------------------|---------------|--------------------------|------------------------|-----------|--------------------------------------|---------------|
| Ag <sub>2</sub> S@ZnO                                    | nanowires     | hydrothermal             | simulated solar light  | MB        | ~7.8 % (60 min)                      | This work     |
| ZnSnO <sub>3</sub>                                       | nanowires     | hydrothermal             | UV                     | MB        | ~58 % (60 min)                       | <sup>1</sup>  |
| ZnO                                                      | nanoflowers   | hydrothermal             | UV                     | MO        | ~50 % (60 min)                       | <sup>2</sup>  |
| Ag <sub>2</sub> O/ZnO                                    | nanoflowers   | chemical coprecipitation | UV                     | MO        | ~20 % (60 min)                       | <sup>2</sup>  |
| N-, S-, and C-doped ZnO                                  | nanoparticles | precipitation            | UV                     | AO7       | ~60 % (60 min)                       | <sup>3</sup>  |
| ZnO/CuO (50%/50%)                                        | nanocomposite | thermal decomposition    | visible light          | MB<br>MO  | ~17.1 %<br>~19.3 % (60 min)          | <sup>4</sup>  |
| ZnO                                                      | microscale    | calcination              | UV+vis                 | CV        | ~10 % (80 min)                       | <sup>5</sup>  |
| ZnO/TiO <sub>2</sub> (0.02-0.05%)                        | microscale    | calcination              | UV+vis                 | CV        | ~30 % (80 min)                       | <sup>5</sup>  |
| TiO <sub>2</sub> P25                                     | microparticle | commercial               | UV+vis                 | CV        | ~40 % (80 min)                       | <sup>5</sup>  |
| Ni <sub>45</sub> Co <sub>37</sub> @Pt <sub>18</sub> /ZnO | nanocomposite | element lithographic     | UV<br>UV+vis           | MB        | ~10 %<br>~20 % (60 min)              | <sup>6</sup>  |
| Pt/ZnO                                                   | nanocomposite | element lithographic     | UV+vis                 | MB        | ~50 % (60 min)                       | <sup>6</sup>  |
| La/TiO <sub>2</sub> -La/ZnO-B-RGO                        | nanocomposite | sol-gel                  | visible light          | MB        | ~44 % (60 min)                       | <sup>7</sup>  |
| NiO-Fe <sub>2</sub> O <sub>3</sub> -ZnO                  | nanocomposite | ion-exchange             | simulated solar light  | MO        | ~48 % (60 min)                       | <sup>8</sup>  |
| C-doped ZnO                                              | nanoparticles | thermal decomposition    | visible light          | RhB       | ~55 % (60 min)                       | <sup>9</sup>  |
| ZnO@TiO <sub>2</sub> /graphene                           | nanocomposite | -                        | simulated solar light  | MB<br>RhB | ~55 %<br>~78 % (60 min)              | <sup>10</sup> |

**Table S1** Photocatalytic performance of ZnO-based materials. MB= methylene blue; MO= methyl orange; AO7= acid orange 7; CV= crystal violet

1. M. K. Lo, S. Y. Lee and K. S. Chang, *J. Phys. Chem. C*, 2015, **119**, 5218-5224.
2. L. Xu, B. Wei, W. Liu, H. Zhang, C. Su and J. Che, *Nanoscale Res. Lett.*, 2013, **8**, 536.

3. L. C. Chen, Y. J. Tu, Y. S. Wang, R. S. Kan and C. M. Huang, *J. Photochem. Photobiol., A*, 2008, **199**, 170-178.
4. R. Saravanan, S. Karthikeyan, V. K. Gupta, G. Sekaran, V. Narayanan and A. Stephen, *Mater. Sci. Eng., C*, 2013, **33**, 91-98.
5. Y. Li, W. Xie, X. Hu, G. Shen, X. Zhou, Y. Xiang, X. Zhao and P. Fang, *Langmuir*, 2010, **26**, 591-597.
6. M. Wen, M. Cheng, S. Zhou, Q. Wu, N. Wang and L. Zhou, *J. Phys. Chem. C*, 2012, **116**, 11702-11708.
7. M. Rostami, *RSC Adv.*, 2017, **7**, 43424-43431.
8. Y. Lei, J. Huo and H. Liao, *RSC Adv.*, 2017, **7**, 40621-40631.
9. S. A. Ansari, S. G. Ansari, H. Foad and M. H. Cho, *New J. Chem.*, 2017, **41**, 9314-9320.
10. S. Y. Guo, J. G. Dai, T. J. Zhao, S. D. Hou, P. Zhang, P. G. Wang and G. X. Sun, *RSC Adv.*, 2017, **7**, 36787-36792.
